# Supplementary material for: MILP Model and a Rolling Horizon Algorithm for Crane Scheduling in a Hybrid Storage Container Terminal
Source: Hindawi journal article supplement (doi:10.1155/2019/4739376), 2019-01-01
Supplement: f1 [file 4739376.f1.xlsx]

## Sheet: small size(=15)
组合/L×CP×MP		1	2	3	4	5	6	7	8	9	10	11	12	13	14	15	16	17	18	19	20	AVG
1	5 × 0.2 × 0.01	618.962	206.423	632	737.308	427.5	738.115	268.038	733.346	400	499.192	595.423	307.462	663.462	818.077	651.115	862	627.5	545.115	330.154	118.077	538.963
2	5 × 0.2 × 0.05	823.038	268.077	640.346	306.269	295.538	461.808	31	393.231	438.115	40.8462	364.769	843.654	202.769	412.077	600	131.385	438.115	414.269	458.038	400	398.167
3	5 × 0.2 × 0.1	48.1154	438.115	227.5	38.1154	261.038	238.115	38.1154	39.5769	438.115	423.077	658.115	323.654	200	66.1154	620.038	332.346	181.346	38.1154	261.962	713.423	279.25
4	5 × 0.2 × 0.15	68.0385	38.1154	218.077	218.077	220.038	418.077	418.077	0	20.0769	400	38	229.923	248	32	18.0769	424.115	468.038	200	195.692	406.5	213.946
5	5 × 0.4 × 0.01	38.1538	248.115	615.538	797.5	373.308	378.231	723.962	234.423	688.346	552.077	268.346	521.615	731.385	523.038	823.038	415.5	1137.62	691.546	268.038	1120	557.489
6	5 × 0.4 × 0.05	660.423	420.038	236.346	20.0385	526.423	228.115	200	248	222.769	220.038	462.346	447.846	241.115	266.192	200	440.846	427.962	403.5	219.923	38.1154	306.502
7	5 × 0.4 × 0.1	242.615	223.962	688.654	757.423	349.846	337.885	22	388.962	329.269	95.6923	438.115	41.1154	367.923	420.038	20.0385	400	575.423	246.269	229.923	203.731	318.944
8	5 × 0.4 × 0.15	219.154	241.115	200	302.731	306.269	438.115	243.923	423.962	230.923	200	20.0385	400	461.731	0	256	438.115	0	225.846	46.0769	20.0385	233.702
9	5 × 0.6 × 0.01	739.192	511.615	659	694.154	620.038	898	862	921.385	471.308	903.615	834.154	964.731	954.308	445.615	620.038	299.731	820.846	568.231	361.538	819.923	698.471
10	5 × 0.6 × 0.05	420.038	220.077	476.462	219.923	211.846	400	54.0385	847.346	241.115	478.346	383.962	628.192	38.1154	223.038	625.769	672.808	648.577	253	593.808	49.9615	384.321
11	5 × 0.6 × 0.1	400	756.923	649.962	0	23.9615	418.115	423.038	72.6538	400	16.1538	38.1154	18.0769	20.0385	498.077	600	366.5	195.538	464.577	369	241.115	298.592
12	5 × 0.6 × 0.15	238.115	438	438.115	383.115	218.077	238.154	420.038	218.077	942.654	41.8077	19.9231	574	353.846	20.0769	286.346	1020.04	230.923	245.615	38.1538	261.038	331.306
13	5 × 0.8 × 0.01	1018.08	611.385	823.038	869.462	890.5	1200	664.423	910.423	390.115	651.385	715.038	677.923	872.615	782.346	602.731	529.846	966	1177.85	970.077	429.269	787.625
14	5 × 0.8 × 0.05	426.923	838.115	386.846	534.423	241.115	852.346	618.077	468.231	600	560.115	643.654	661.038	458.038	352.269	611.731	823.038	448	400.038	618.077	961.731	575.19
15	5 × 0.8 × 0.1	640.346	620.038	1013.31	48	641.115	438.115	1020.04	38.1154	554.731	420.038	400	633.038	38.1538	645.654	223.038	253.885	820.038	22	223.038	629.923	466.131
16	5 × 0.8 × 0.15	1002.65	600	694.038	19.9231	418.077	113.769	830.5	445.038	238.115	643.846	260.231	311.5	422.769	420.038	213.423	38.1154	620.038	618.962	38.1154	248.115	409.863
17	15 × 0.2 × 0.01	418.077	186.41	538.23	761.344	327.5	400	208.038	304.1	733.346	299.192	795.431	211.234	478.346	718.193	525.769	627.5	812.345	118.077	545.115	330.154	466.92
18	15 × 0.2 × 0.05	40.8462	234.342	540.346	402.769	299.135	306.269	23	400	438.115	0	306.269	217.077	602.769	169.031	500.786	414.269	438.115	99.1067	438.404	418.115	314.438
19	15 × 0.2 × 0.1	20.0769	438.115	195.692	40.1154	261.038	238.115	0	38.1154	418.077	520.038	597.326	353.104	203.067	38	349.846	482.142	218.077	60.2301	268.038	618.104	267.866
20	15 × 0.2 × 0.15	46.0769	0.038462	195.692	0	182.115	424.115	22	0	115.577	345.615	23.9615	211.846	219.154	220.038	0	324.115	2.3	266.192	0	256.137	142.749
21	15 × 0.4 × 0.01	72.6538	268.038	672.808	523.038	0	259.301	694.154	1477.85	168.346	664.5	668.346	937.615	552.077	766.5	971.24	418.115	268.346	625.115	288.233	1118.08	570.718
22	15 × 0.4 × 0.05	526.423	427.962	206.116	38.12	628.423	178.5	220.038	219.923	300.846	200	72.6538	458.038	253	284.092	41.8077	478.346	438	575.5	319.077	423.038	314.495
23	15 × 0.4 × 0.1	298.115	230.62	571.5	658.115	319.126	317.173	0	230.62	329.269	105.642	338.115	0	378.319	285.437	95.0543	355.098	466.179	346.846	388.962	210	296.21
24	15 × 0.4 × 0.15	256	438.115	0	202.631	200	20.0385	41.1154	445.052	330.125	256	423.962	315.103	261.731	230.923	120.473	308.975	243.923	230.923	0	19.9231	217.251
25	15 × 0.6 × 0.01	890.5	602.731	477.098	432.05	611.385	1200	798.562	299.731	634.074	36.052	498.077	692.484	1245.03	998.353	1277.85	736.974	834.154	665.475	411.644	1018.08	718.015
26	15 × 0.6 × 0.05	600	230.923	554.731	238.154	183.115	420.038	38.1154	898	182.115	464.577	534.423	602.731	68.0385	211.846	649.962	403.5	715.038	234.342	552.077	72.6538	392.719
27	15 × 0.6 × 0.1	438.115	248	41.8077	18.0769	218.077	46.0769	523.038	757.423	400.038	0	23.9615	0	471.308	402.769	38.1154	420.038	390.115	368.149	131.385	664.423	280.046
28	15 × 0.6 × 0.15	19.9231	337.885	420.038	352.269	64.2352	299.731	438	418.077	643.654	866	0	213.077	23.9615	390.115	229.923	964.731	41.8077	219.923	41.1154	221.471	310.297
29	15 × 0.8 × 0.01	1304.53	628.192	898	664.423	890.5	1177.85	364.523	1020.04	438.115	369	970.077	818.077	942.654	823.038	640.346	620.038	1120	820.846	739.192	554.731	790.209
30	15 × 0.8 × 0.05	231.342	241.115	352.269	525.769	213.077	1200	668.346	362.741	847.346	455.77	625.769	472.947	618.077	298.05	659.046	664.5	354.732	402.769	640.346	694.154	526.408
31	15 × 0.8 × 0.1	381.342	981.064	0	56.1145	223.038	1002.65	439.115	38.1454	820.038	223.038	629.923	575.011	195.154	388.962	458.038	664.5	238.115	15.0813	942.804	219.923	424.603
32	15 × 0.8 × 0.15	419.923	800	494.038	219.923	0	643.245	324.115	41.8077	672.808	388.962	620.038	168.346	182.115	942.654	414.269	306.269	464.577	218.084	41.8077	319.126	384.105
33	25 × 0.2 × 0.01	438.115	872.615	739.192	268.038	285.437	388.962	300.846	525.769	218.077	187.097	457.731	713.423	206.116	820.038	921.385	243.923	911.278	478.346	1277.85	890.5	557.237
34	25 × 0.2 × 0.05	408.406	302.046	112.215	41.8077	417.513	471.308	320.05	41.8077	869.462	390.115	606.901	554.731	700.033	569.031	218.077	459.064	169.031	354.732	464.433	820.038	414.54
35	25 × 0.2 × 0.1	13.0536	188.065	427.231	240.501	349.846	638.115	60.2301	238.115	38.1154	60.04	0	410.145	602.982	230.62	739.192	575.692	330.25	41.8077	230.62	386.846	290.073
36	25 × 0.2 × 0.15	23.9615	41.8077	418.038	415.5	218.115	0	380.259	355.098	123.962	0	183.306	0	418.038	63.0642	144.761	468.038	159.154	202.631	215.094	75.3512	195.309
37	25 × 0.4 × 0.01	971.24	668.038	669.115	367.341	400	459.301	600.08	483.903	851.463	668.346	352.078	656.521	552.077	642.032	556.275	819.039	490.15	223.038	400	775.95	580.299
38	25 × 0.4 × 0.05	38.12	362.741	218.115	383.115	300	354.732	369	0	509.483	330.154	468.038	348.086	562.962	168.038	172.654	478.692	491.728	299.731	449.269	256.115	328.039
39	25 × 0.4 × 0.1	306.269	164.235	834.154	289.084	223.038	427.962	234.423	575.423	220.077	418.077	18.0769	211.846	0	352.269	403.5	400	0	478.692	288.962	369	310.754
40	25 × 0.4 × 0.15	19.9231	238.154	445.052	464.577	0	320.885	219.923	230.923	420.038	41.8077	0	211.351	478.692	220.077	22	418.038	386.846	355.098	728.615	230.923	272.646
41	25 × 0.6 × 0.01	1041.15	15.0813	872.615	716.987	85.05	1595.86	998.353	618.077	139.115	669.115	326.853	942.654	898	739.192	777.62	546.643	985	617.385	1177.85	900	733.13
42	25 × 0.6 × 0.05	403.5	537.558	0	388.962	478.346	72.6538	211.846	672.808	382.115	0	299.731	18.0769	241.115	715.038	588.95	659.046	438.404	503.423	800	715.038	406.331
43	25 × 0.6 × 0.1	27.0357	0	221.964	400.038	164.351	460.624	423.038	41.8077	38.035	351.036	346.083	200	228.077	0	464.577	719.457	460.624	429.06	396.269	419.923	289.6
44	25 × 0.6 × 0.15	41.1154	0	800	438	0	38.035	537.855	1304.53	20.0769	131.385	322.57	457.731	388.962	659.945	526.423	0	141.808	393.231	389.269	414.269	350.26
45	25 × 0.8 × 0.01	355.5	1214.1	900	483.05	622.973	836.158	1307.07	820.4	1108.07	669.115	418.038	1200.45	601.864	575.423	1120	552.077	665.475	619.608	1006.5	971.24	802.356
46	25 × 0.8 × 0.05	401.945	663.842	229.651	213.077	739.192	262.056	367.923	426.923	396.269	728.615	400.038	820.038	200.783	712.854	1054.17	800.73	649.962	890.5	551.088	367.341	543.85
47	25 × 0.8 × 0.1	650.582	1277.85	942.654	800	100.853	0	230.923	1041.15	331.371	347.846	0	337.342	669.115	41.08	407.462	20.0385	500.786	615.081	568.231	534.423	470.839
48	25 × 0.8 × 0.15	0	438.115	0	898	554.731	426.923	449.269	0	452.962	575.5	369	457.731	361.538	241.115	114.02	41.1154	376.151	619.923	245.048	407.577	351.436
49	35 × 0.2 × 0.01	471.308	575.692	546.643	900	733.346	638.115	241.73	400	352.078	832.038	595.423	618.077	362.732	238.115	558.154	1239.81	101.974	599.28	460.624	1513.58	598.936
50	35 × 0.2 × 0.05	800	41.8077	365.274	218.115	575.011	362.741	226.074	41.1154	289.6	328.04	169.031	351.438	537.558	234.342	71.0528	438.115	420.038	426.923	483.074	477.098	342.822
51	35 × 0.2 × 0.1	41.8077	212.843	38.1154	0	118.085	400	160.23	600.01	136.147	299.135	217.077	620.038	602.982	181.346	66.1154	401.084	332.346	181.346	138.115	261.962	250.439
52	35 × 0.2 × 0.15	0	22	18.0769	906.808	131.385	165.846	503.423	228.077	0	389.269	394.5	20.0385	115.577	0	265.192	152.692	38.1154	169.923	20.0385	109.962	182.546
53	35 × 0.4 × 0.01	389.083	106.739	200	630.843	337.342	438	400	0	900	1041.15	990.084	1000	558.154	820.038	836.118	575.5	971.24	1304.53	620.038	511.901	631.538
54	35 × 0.4 × 0.05	239.115	72.6538	468.038	672.808	141.808	215.5	393.231	0	41.1154	440.846	200	0	230.923	800	431	619.307	1008.07	241.115	1066.81	80.0632	368.12
55	35 × 0.4 × 0.1	2.3	298.115	11.0754	389.269	230.62	685.825	182.55	400.737	291.064	0	317.173	100.1	230.923	452.269	72.6538	255.808	130.853	229.651	672.808	400	267.69
56	35 × 0.4 × 0.15	20.0385	48	188.5	228.077	740.154	87.9615	48	438.115	228.077	277.385	38.1538	931.038	229.923	20.0385	238.115	23.8462	828.077	220.038	122.269	20.0385	248.792
57	35 × 0.6 × 0.01	320.885	1239.81	832.038	1000	900	723.731	478.692	1139.5	1006.5	562.962	820.038	901	1041.15	738.077	168.038	456.462	728.615	669.462	685.538	1032.46	772.248
58	35 × 0.6 × 0.05	328.046	258.338	486.979	0	800	200.115	35.05	1025.95	81.4491	548.231	158.065	498.091	401.808	193.058	131.385	368.953	257.905	457.731	348.231	342.65	346.102
59	35 × 0.6 × 0.1	131.385	1214.1	41.08	169.923	602.982	415.5	211.846	985	0	941.154	0	241.115	20.0769	823.038	72.6538	188.065	256.115	450.953	320.05	370.115	372.757
60	35 × 0.6 × 0.15	911.049	19.9231	0	522.867	41.8077	235.25	942.654	18.0769	472.581	100.853	447.846	864	650.582	1120.08	0	0	362.741	369.604	130.853	493.638	385.22
61	35 × 0.8 × 0.01	642.577	370.654	1166.81	407.462	1192.08	542.577	347.846	558.154	1083.81	423.038	550.308	200	979.846	48.0385	1001.96	500	589.577	390.731	534.538	557.423	604.371
62	35 × 0.8 × 0.05	642	263.998	503	437.81	0	547.895	1000	300.276	737.229	51.3682	752.346	554.731	726.955	324.115	614.51	911.049	362.741	306.269	347.846	629.115	500.663
63	35 × 0.8 × 0.1	431	800	438.115	255.808	230.5	563.577	600	620.038	348.231	267.654	440.846	203.154	406.808	620.038	310.538	548.231	248	823.038	642	20.0385	440.881
64	35 × 0.8 × 0.15	618.077	575.692	396.269	457.731	400	800	218.115	449.269	419.923	618.077	38.1154	407.577	241.115	20.0769	242.962	522.769	438.115	400	800	238.115	415.1

## Sheet: large size(=80)
组合/LxCPxMP		1	2	3	4	5	6	7	8	9	10	11	12	13	14	15	16	17	18	19	20	AVG
1	5 x 0.2 x 0.01	21648.2	19503.2	21625.2	22196.3	19631.7	20519	20385	20251	20117.1	19983.1	20189.5	20201.4	20213.3	20225.2	20237.2	20249.1	20261	20272.9	20284.8	20296.7	20414.5	2041.45
2	5 x 0.2 x 0.05	18073.3	23107.4	20617.3	18436.2	22487	22383.3	23318.2	23511.2	19480.1	20044.1	19192.4	18340.8	17489.1	16637.5	15785.8	14934.2	20680	21147.8	21615.7	22083.5	19968.2	1996.82
3	5 x 0.2 x 0.1	16702.2	21730.1	19457.5	13919	14821	20617.3	17205.5	17014.3	16823.1	16632	16440.8	19249.7	23511.2	22172.8	20834.4	19496	18157.6	16819.1	24828.2	24829.2	19063	1906.3
4	5 x 0.2 x 0.15	13228.6	17179	19480.1	17627.2	12217.2	15474	15316.6	15159.1	15001.7	14844.2	14686.8	14529.3	14371.8	14973.1	15043.3	19113.4	15183.6	15253.8	15323.9	15394.1	15470	1547
5	5 x 0.4 x 0.01	20614.8	21947	28399.1	25918.1	22656	26323	27128.3	27933.6	28739	25238.1	22656	20073.8	24656	22073.8	21641	22908.2	24175.3	25442.5	19324.9	24073.8	24096.1	2409.61
6	5 x 0.4 x 0.05	22648.5	18693.8	21038.2	21046	26477.4	24983.8	25984.9	21038.2	21546	22053.9	22561.7	23069.6	23577.4	22526.8	22450.3	22373.7	22297.1	22220.6	22144	22067.4	22540	2254
7	5 x 0.4 x 0.1	23424.6	22049.6	17017.9	25100	25799.6	25018.5	25798.5	26578.5	27358.6	22054.9	22562.7	23070.6	23578.4	21761.7	21107.2	20452.7	19798.3	19143.8	22145	22709.1	22826.5	2282.65
8	5 x 0.4 x 0.15	21320	21480	27673.5	22916.2	25757.3	26922.7	27953.7	19457.5	18693.8	19249.7	18925.8	18821.9	21147.8	21853.8	22964.8	24075.8	22049.6	23160.6	23330.4	23500.3	22562.8	2256.28
9	5 x 0.6 x 0.01	25889.3	28683.2	21906.1	26174.6	24734.8	24032.3	23550.6	23068.8	22587	22105.3	21623.5	21141.7	22916.2	22434.4	22629.5	22824.6	23019.7	23214.7	23409.8	23604.9	23477.6	2347.76
10	5 x 0.6 x 0.05	28522.4	26572.6	25956.5	27774.2	25282.4	25238.1	24710.2	24182.4	23654.5	23126.6	22598.8	22070.9	21543.1	19631.7	19103.9	22598.8	21379.2	21643.1	21907	22171	23483.4	2348.34
11	5 x 0.6 x 0.1	28428.6	28546.3	24828.2	26471	27154.8	25698.9	25236.6	24774.4	25391.6	25289.1	25366.6	25444.1	25521.5	24921.3	24791.5	24661.8	24532	24402.3	24272.5	24142.8	25493.8	2549.38
12	5 x 0.6 x 0.15	25391.6	26430.8	26926.9	26200.8	28184.1	25699.9	26194.1	25943.6	25693.2	25442.8	25192.3	24941.9	24691.4	24441	24982.5	24732.1	24719.2	24706.4	24693.5	25238.1	25522.3	2552.23
13	5 x 0.8 x 0.01	29033.8	29592.4	30180	29837.8	30110.6	30470.6	30710.5	30950.4	31190.3	31430.2	29837.8	30110.6	30470.6	29941.9	29735.3	29528.7	29322.2	31430.2	30344.7	30422.8	30232.6	3023.26
14	5 x 0.8 x 0.05	27904.1	29734.4	27430.7	28063.5	29768.8	29197.8	29403.7	29609.5	29815.4	30021.2	30227.1	31546	31751.9	32291.7	32831.5	31528.7	32953.6	33327.8	33701.9	31076.1	30609.3	3060.93
15	5 x 0.8 x 0.1	29342.6	30402.7	28274.2	28659.5	28404.3	27930.8	27568.8	27206.8	26844.9	26482.9	28404.3	27568.8	28348.5	29757.9	29167.2	29576.5	29985.8	35225.3	37244.7	34750.3	29557.4	2955.74
16	5 x 0.8 x 0.15	29416.8	27875.3	29097.1	28858.2	25521.5	24283.3	23045.1	21806.8	20568.6	22944.5	22911	23479.9	24048.7	14098	23409.8	16452.9	29077.3	26477.4	18157.6	21538.5	23653.4	2365.34
17	15 x 0.2 x 0.01	21128.2	19103.2	19135.2	22532.3	22561.7	19631.7	19631.7	20189.5	19631.7	19631.7	19189.5	18693.8	21213.3	22225.2	19249.7	18249.1	16261	20072.9	20114.8	20232.3	19933.9	1993.39
18	15 x 0.2 x 0.05	17213.3	22377.5	20211.4	21791.1	17638.1	20031.1	22206.8	22622.4	23038	25571.8	19572.9	16637.5	21341	19276.5	19744.3	20212.1	20680	21147.8	22297.1	18926.1	20626.8	2062.68
19	15 x 0.2 x 0.1	22598.8	21147.8	23069.6	23019.7	22105.3	15001.7	21543.1	18157.6	24732.1	14844.2	12217.2	14529.3	14973.1	20834.4	24983.8	17014.3	17017.9	15253.8	17025.2	22709.1	19138.9	1913.89
20	15 x 0.2 x 0.15	14844.2	16452.9	18061.6	17431.8	16452.9	25706.7	14902.4	14098	13234.9	12371.7	13218.4	11452.9	11426.5	13234.9	10486.7	15113.4	13474	13434.6	12371.7	11308.8	14454	1445.4
21	15 x 0.4 x 0.01	24402.3	18925.8	25521.5	29528.7	19192.4	25521.5	22908.2	22964.8	19631.7	28399.1	22172.8	21068.6	23126.6	23292	23457.4	23622.8	20073.8	22916.2	14686.8	21761.7	22658.7	2265.87
22	15 x 0.4 x 0.05	24732.1	27774.2	19276.5	10778.7	24791.5	23114.3	23409.8	22390.2	21699.4	21008.5	21127.2	21245.9	21364.6	21068.6	20711.5	22526.8	25282.4	17768.8	12356.1	18157.6	21029.2	2102.92
23	15 x 0.4 x 0.1	29941.9	24983.8	21147.8	15706.7	25733.2	20707	27110.7	28109.8	16637.5	20452.7	20081.6	19710.5	19339.3	25442.8	23019.7	18157.6	21194.1	14973.1	23019.7	18925.8	21719.8	2171.98
24	15 x 0.4 x 0.15	20711.5	14973.1	24732.1	17431.8	16452.9	15474	30811.6	19255.9	22105.3	21791.1	21477	21162.9	20848.7	19255.9	17663.1	18061.6	18460.1	18858.6	23500.3	22908.2	20296.8	2029.68
25	15 x 0.6 x 0.01	24941.9	14973.1	24532	29077.3	24441	25925.8	25880.2	22070.9	20770.8	18843.4	22872.4	18697.8	25442.8	21543.1	17643.4	17213.3	25698.9	18289.9	30769.5	20199.1	22491.3	2249.13
26	15 x 0.6 x 0.05	24182.4	19103.9	24332	25192.3	26052.7	26913	17267.5	18670.7	20073.8	21477	22880.1	24283.3	20073.8	18925.8	17205.5	23038	16452.9	23457.4	20199.5	23047.5	21641.5	2164.15
27	15 x 0.6 x 0.1	21791.1	31751.9	22526.8	20834.4	23068.8	20707	28399.1	20936.9	19192.4	19455.3	19718.3	25521.5	31324.8	18940.1	22229.7	20680	22105.3	23530.6	24955.9	20053.4	22886.2	2288.62
28	15 x 0.6 x 0.15	21162.9	29450.5	32831.5	16791.8	27430.7	18061.6	22105.3	35225.3	23069.6	19631.7	14821	24532	22622.4	24075.8	29735.3	32953.6	21147.8	22220.6	23292	21791.1	24147.6	2414.76
29	15 x 0.8 x 0.01	21761.7	21194.1	20626.5	14844.2	29815.4	29403.7	31190.3	31511.3	32198.8	32886.2	33573.7	25521.5	30402.7	32831.5	35260.3	37689.1	21906.1	21832.7	30344.8	32356.9	28357.6	2835.76
30	15 x 0.8 x 0.05	21643.1	28659.5	35675.9	28274.2	32200.1	25698.9	32291.7	17638.1	28399.8	39021.3	18839.1	21511	38182.9	22070.9	40785.2	24983.8	30402.7	35821.5	31240.3	17431.8	28538.6	2853.86
31	15 x 0.8 x 0.1	19710.5	36124.9	28914.7	21704.4	24404.4	27104.4	29804.4	32504.4	35204.4	23114.3	25521.5	27928.8	30336	15310.4	26310.2	37310	28309.7	19309.5	20452.7	18697.8	26403.9	2640.39
32	15 x 0.8 x 0.15	25698.9	21245.9	16792.9	22105.3	27417.6	18925.8	27317.1	24774.4	22231.6	19688.8	17146.1	24603.3	22489.1	20374.9	18260.7	16146.5	18061.6	19976.7	21891.8	20770.8	21296	2129.6
33	25 x 0.2 x 0.01	22455.6	22666.8	22578	32566.8	19566.7	20566.8	17566.7	22566.9	34911.9	20266.8	17566.6	20576.1	22512.5	19572.9	22560.7	30583.3	20550.7	19566.2	19663.1	22470.4	22566.8	2256.68
34	25 x 0.2 x 0.05	29015.2	18012.4	15013.8	16010	17017.6	13113.8	30913.8	15267.8	15759.7	15550.4	16477.2	14013.8	23111.7	17915.9	17509.6	16518	15445.9	17581.7	18445.8	17581.7	18013.8	1801.38
35	25 x 0.2 x 0.1	21412.6	20960.8	22736.8	20536.6	19549.6	21023.9	25037.7	20035.7	18038.2	21035.3	30913.2	20160.3	13271.3	19802.1	23393.5	20979.9	19268.8	20504.6	21030	21043.4	21036.7	2103.67
36	25 x 0.2 x 0.15	17043.7	15974.5	15065.9	15952.3	16885.8	15132.4	14009.1	15552.8	16465.4	19471.7	15546.5	16064.8	13003.4	26009.3	14008.9	13959.1	15100.1	15921.5	13649.3	15365.5	16009.1	1600.91
37	25 x 0.4 x 0.01	27919.1	26850	25941.3	26827.8	27761.2	26007.9	24884.6	26428.2	27340.9	30347.2	26421.9	26940.2	23878.9	36884.8	24884.3	24834.6	25975.6	26797	24524.7	26240.9	26884.6	2688.46
38	25 x 0.4 x 0.05	21034.8	19965.7	19057	19943.4	20876.9	19123.5	18000.2	19543.9	20456.5	23462.9	19537.6	20055.9	16994.6	30000.4	18000	17950.2	19091.2	19912.7	17640.4	19356.6	20000.2	2000.02
39	25 x 0.4 x 0.1	25550.1	24480.9	23572.3	24458.7	25392.2	23638.8	22515.5	24059.2	24971.8	27978.1	24052.9	24571.2	21509.9	34515.7	22515.3	22465.5	23606.5	24428	22155.7	23871.9	24515.5	2451.55
40	25 x 0.4 x 0.15	21477.2	20408	19499.4	20385.8	21319.3	19565.9	18442.6	19986.3	20898.9	23905.2	19980	20498.3	17436.9	30442.8	18442.4	18392.6	19533.6	20355	18082.8	19799	20442.6	2044.26
41	25 x 0.6 x 0.01	26147	25077.9	24169.2	25055.6	25989.1	24235.7	23112.4	24656.1	25568.7	28575.1	24649.8	25168.1	22106.8	35112.6	23112.2	23062.4	24203.4	25024.9	22752.6	24468.8	25112.4	2511.24
42	25 x 0.6 x 0.05	22924	21854.9	20946.3	21832.7	22766.2	21012.8	19889.5	21433.2	22345.8	25352.1	21426.8	21945.1	18883.8	31889.7	19889.3	19839.5	20980.5	21801.9	19529.7	21245.8	21889.5	2188.95
43	25 x 0.6 x 0.1	25637.6	23368.5	23059.9	23946.3	24879.7	22124.4	22003.1	23546.7	25461.4	25465.1	23540.4	24058.7	20997.4	36003.9	22002.9	21953.1	23094.1	23915.5	21643.3	23359.4	24003.1	2400.31
44	25 x 0.6 x 0.15	28001.9	25732.7	25424.1	26310.5	27244	24488.6	24367.3	25911	27825.6	27829.3	25904.7	26422.9	23361.6	38368.1	24367.1	24317.3	25458.3	26279.7	24007.5	25723.6	26367.3	2636.73
45	25 x 0.8 x 0.01	33294.4	31025.2	30716.6	31603	32536.5	29781.1	29659.8	31203.5	33118.1	33121.8	31197.2	31715.5	28654.2	43660.6	29659.6	29609.8	30750.8	31572.3	29300	31016.2	31659.8	3165.98
46	25 x 0.8 x 0.05	30642.5	28373.4	28064.8	28951.2	29884.6	27129.3	27008	28551.6	30466.3	30470	28545.3	29063.6	26002.3	41008.8	27007.8	26958	28099	28920.4	26648.2	28364.3	29008	2900.8
47	25 x 0.8 x 0.1	28724	26454.8	26146.2	27032.6	27966.1	25210.7	25089.4	26633.1	28547.7	28551.4	26626.8	27145.1	24083.7	39090.2	25089.2	25039.4	26180.4	27001.9	24729.6	26445.8	27089.4	2708.94
48	25 x 0.8 x 0.15	24287.7	22018.5	21709.9	22596.3	23529.8	20774.4	20653.1	22196.8	24111.4	24115.1	22190.5	22708.8	19647.5	34653.9	20652.9	20603.1	21744.1	22565.6	20293.3	22009.5	22653.1	2265.31
49	35 x 0.2 x 0.01	22419.4	23488.5	24510.7	23397.1	25330.6	22577.3	20453.9	21774.6	23910.3	28139.6	26403	23097.9	20448.3	30454.1	22239.7	21318.9	22544.9	22665.4	22431.2	21473.2	23453.9	2345.39
50	35 x 0.2 x 0.05	18639.1	19708.3	20730.5	19616.9	21550.4	18797	16673.7	17994.4	20130	24359.3	22622.7	19317.7	16668	26673.9	18459.5	17538.7	18764.7	18885.1	18650.9	17693	19673.7	1967.37
51	35 x 0.2 x 0.1	20901.4	21970.6	22992.8	21879.2	23812.7	21059.3	18936	20256.7	22392.3	26621.6	24885	21580	18930.3	28936.2	20721.8	19801	21027	21147.5	20913.3	19955.3	21936	2193.6
52	35 x 0.2 x 0.15	16295.1	17364.2	18386.4	17272.9	19206.3	16453	14329.7	15650.3	17786	22015.3	20278.7	16973.7	14324	24329.9	16115.4	15194.7	16420.7	16541.1	16306.9	15348.9	17329.7	1732.97
53	35 x 0.4 x 0.01	26396.5	27465.6	28487.9	27374.3	29307.8	26554.4	24431.1	25751.8	27887.4	32116.7	30380.1	27075.1	24425.4	34431.3	26216.9	25296.1	26522.1	26642.5	26408.3	25450.4	27431.1	2743.11
54	35 x 0.4 x 0.05	19970.2	21039.3	22061.6	20948	22881.4	20128.1	18004.8	19325.4	21461.1	25690.4	23953.8	20648.8	17999.1	28005	19790.6	18869.8	20095.8	20216.2	19982	19024.1	21004.8	2100.48
55	35 x 0.4 x 0.1	18581.2	19650.3	20672.5	19559	21492.4	18739.1	16615.7	17936.4	20072.1	24301.4	22564.8	19259.7	16610.1	26616	18401.5	17480.7	18706.7	18827.2	18593	17635	19615.7	1961.57
56	35 x 0.4 x 0.15	17671.8	18740.9	19763.1	18649.6	20583	17829.7	15706.3	17027	19162.7	23392	21655.4	18350.3	15700.7	25706.6	17492.1	16571.3	17797.3	17917.8	17683.6	16725.6	18706.3	1870.63
57	35 x 0.6 x 0.01	29612.6	27412.6	27069.4	34955.8	24889.3	26134	26012.6	27556.3	26471	29474.7	27550	32636.1	24939.2	35513.4	26012.4	25962.6	25103.6	29925.1	25652.8	27369	28012.6	2801.26
58	35 x 0.6 x 0.05	28821.5	26621.5	26278.3	34164.7	24098.2	25342.8	25221.5	26765.2	25679.8	28683.5	26758.9	31844.9	24148	34722.3	25221.3	25171.5	24312.5	29133.9	24861.7	26577.8	27221.5	2722.15
59	35 x 0.6 x 0.1	26733.2	24533.2	24189.9	32076.4	22009.8	23254.5	23133.2	24676.8	23591.5	26595.2	24670.5	29756.6	22059.7	32634	23132.9	23083.2	22224.2	27045.6	22773.3	24489.5	25133.2	2513.32
60	35 x 0.6 x 0.15	28821.2	26621.2	26278	34164.4	24097.9	25342.5	25221.2	26764.9	25679.5	28683.2	26758.6	31844.7	24147.7	34722	25221	25171.2	24312.2	29133.7	24861.4	26577.6	27221.2	2722.12
61	35 x 0.8 x 0.01	35839.2	33639.2	33296	41182.4	31115.8	32360.5	32239.2	33782.8	32697.5	35701.2	33776.5	38862.6	31165.7	41740	32239	32189.2	31330.2	36151.6	31879.4	33595.5	34239.2	3423.92
62	35 x 0.8 x 0.05	31508.1	29308.1	28964.9	36851.3	26784.8	28029.4	27908.1	29451.8	28366.4	31370.1	29445.5	34531.6	26834.7	37408.9	27907.9	27858.1	26999.1	31820.6	27548.3	29264.5	29908.1	2990.81
63	35 x 0.8 x 0.1	30129.5	27929.5	27586.3	35472.7	25406.2	26650.8	26529.5	28073.2	26987.8	29991.6	28066.9	33153	25456.1	36030.3	26529.3	26479.5	25620.5	30442	26169.7	27885.9	28529.5	2852.95
64	35 x 0.8 x 0.15	20393.7	18193.7	17850.4	25736.9	15670.3	16915	16793.7	18337.3	17252	20255.7	18331	23417.1	15720.2	26294.5	16793.4	16743.7	15884.7	20706.1	16433.8	18150	18793.7	1879.37
